# Supplementary material
Source: publisher figshare collection journal article supplement (https://acs.figshare.com/ndownloader/files/27703285)
Supplement: Supplementary file 1 [file 27703285]

## Supporting information

# Ultrasensitive Nucleic Acid Assay Based on AIE-active Polymer Dots with Excellent Electrochemiluminescence Stability

Nan Zhang<sup>1,‡</sup>, Hang Gao<sup>1,‡</sup>, Yi-Lei Jia<sup>1</sup>, Jian-Bin Pan<sup>1,\*</sup>, Xi-Liang Luo,<sup>2</sup> Hong-Yuan Chen<sup>1</sup> and  
Jing-Juan Xu<sup>1,\*</sup>

1: State Key Laboratory of Analytical Chemistry for Life Science, School of Chemistry and Chemical Engineering, Nanjing University, Nanjing 210023, China.

2: Key Laboratory of Optic-electric Sensing and Analytical Chemistry for Life Science (MOE), College of Chemistry and Molecular Engineering, Qingdao University of Science and Technology, Qingdao 266042, China

\* Corresponding author E-mail: [jbpan@nju.edu.cn](mailto:jbpan@nju.edu.cn)(J.B. Pan), [xujj@nju.edu.cn](mailto:xujj@nju.edu.cn)(J.J. Xu)

‡ These authors contributed equally to the work.

# Table of contents

## 1. Experimental Section

Materials and Reagents

Apparatus

ECL spectra measurement

Experiment of ECL imaging

## 2. Supplementary Figures

Figure S1. Nuclear magnetic resonance spectroscopy ( $^1\text{H}$  NMR) of polymer.

Figure S2. Absorbance spectrum of polymer and Pdots.

Figure S3. Phosphorescent lifetime of Pdots.

Figure S4. Reduction-oxidative ECL and corresponding CV of the Pdots.

Figure S5. Cyclic voltammogram of TPrA.

Figure S6. ECL stability of reduction-oxidative ECL of Pdots.

Figure S7. Optimization of the kinds of coreactants.

Figure S8. Optimization of the TPrA concentration.

Figure S9 and Figure S10. Polyacrylamide gel electrophoresis analysis.

Figure S11. Cyclic voltammograms and EIS profiles of the stepwise fabrications of the ECL sensor.

## 3. Supplementary Tables

Table S1. DNA and miRNA sequences used in this work.

Table S2. Summarization of the experimental findings for Pdots.

Table S3. Comparison of the ECL efficiency of different nanomaterials.

Table S4. Comparison of different methods for detection of miRNA-21.

## Supporting References

## 1. Experimental Section

### Materials and Reagents.

6-mercapto-1-hexanol(MCH), 1-ethyl-3-(3-dimethylaminopropyl) carbodiimide (EDC), N-hydroxysuccinimide (NHS), Tri-n-propylamine (TPrA), triethylamine (TEA), N-butyl-diethanolamine (BDEA), Poly(styrene-co-maleic anhydride) (PSMA) were obtained from Sigma-Aldrich. Co., Ltd. (Shanghai, China). 4,4'-(2,2-bis(4-(octyloxy)phenyl)ethene-1,1-diyl)bis(bromobenzene), 4,7-bis(4,4,5,5-tetramethyl-1,3,2-dioxaborolan-2-yl)benzo[c][1,2,5]thiadiazole,  $\text{Pd(PPh}_3)_4$ , bromobenzene and phenylboronic acid were obtained from J&K Chemical Ltd (Shanghai, China). Potassium Carbonate ( $\text{K}_2\text{CO}_3$ ), Toluene (PhMe) and methanol were purchased from Sinopharm Chemical Reagent Co. Ltd. DSN and 10× DSN master buffer (500 mM Tris-HCl, 50 mM  $\text{MgCl}_2$ , 10 mM D,L-dithiothreitol (DTT), pH 8.0) were purchased from Evrogen (Moscow, Russia). HPLC-purified, synthetic DNA and miRNAs were purchased from Sangon Biotech Co. Ltd. (Shanghai, China), detailed sequence information is listed in Table S1. Unless specifically mentioned, other reagents were of analytical-grade quality and used as received without further purification. Aqueous solutions were prepared using ultrapure water. Ultrapure water obtained from Millipore water purification system ( $\geq 18 \text{ M}\Omega \text{ cm}^{-1}$ , Milli-Q, Millipore, MA) was used throughout the experiments.

### Apparatus.

The transmission electron microscopy (TEM) image was acquired on a JEM-2100 (JEOL Ltd., Japan) Instrument. The NMR spectra were obtained from a Bruker Advance 400 spectrometer (Bruker, German) with 400 MHz for  $^1\text{H}$  NMR reported as parts per million (ppm) from the internal standard tetramethylsilane (TMS). The UV-vis spectrum were recorded on a Model UV-3600 spectrophotometer (Shimadzu, Kyoto, Japan). Fluorescence measurements were obtained on a F-7000 fluorescence spectrometer (Hitachi Co., Japan). Dynamic light scattering (DLS) measurement was performed on a 90 Plus/Bi-MAS equipment (Brookhaven Instruments Co., USA). Electrochemical impedance spectroscopic (EIS) measurements were performed on a PGSTAT30/FRA2 system (Autolab, the Netherlands) in a solution containing 0.1 M KCl and 5 mM  $\text{K}_3[\text{Fe}(\text{CN})_6]/\text{K}_4[\text{Fe}(\text{CN})_6]$  (1:1). Electrochemical experiments were performed on a CHI 760E electrochemical workstation (CHI instruments Inc., China). ECL experiments were carried out on a MPI-E multifunctional electrochemical and chemiluminescent analytical system (Xi'an Remex Analytical Instrument Co., Ltd. China). ECL transient experiments were performed by our self-built instrument combining a PGSTAT30/FRA2 system (Autolab, the Netherlands) and an ECL analytical system.

### ECL spectra measurement

The ECL spectra were obtained on an F-7000 fluorescence spectrophotometer

which in the closed state of lamp and triggered by a CHI 660D electrochemical workstation. The Pdots modified indium tin oxide (ITO) electrodes were inserted in 0.1 M PBS containing 25 mM TPrA to apply a constant potential of +1.5 V for 9 s to get the ECL spectra.

### Experiment of ECL imaging

The ECL image was obtained with a self-made ECL imaging system equipped with focus lens (EF 50mm f/1.2L USM, Canon) and Retiga R6 color scientific CCD camera (QImaging, Canada) in a dark box. The Pdots modified indium tin oxide (ITO) electrodes were reacted with 25 mM TPrA contained in 0.1 M PBS solution under a cyclic voltammetry scanning from 0-1.5 V with a scan rate of 0.3 V/s and the exposure time was 30 s.

## 2. Supplementary Figures

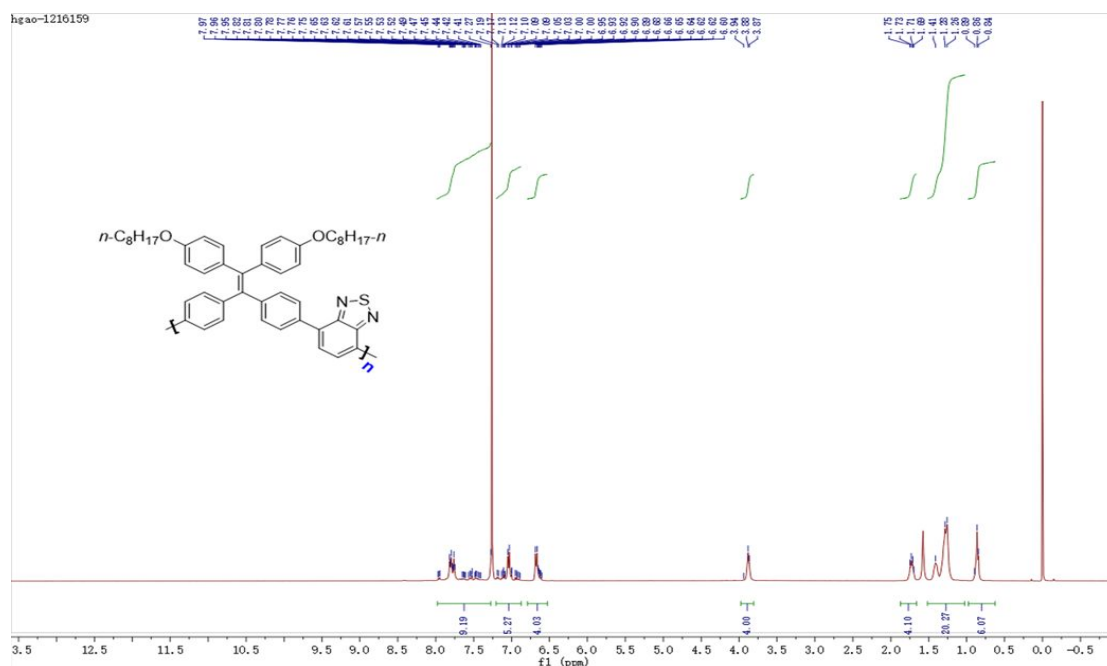

Figure S1. Nuclear magnetic resonance spectroscopy ( $^1\text{H}$  NMR) of polymer.  
 $^1\text{H}$  NMR (400 MHz,  $\text{CDCl}_3$ )  $\delta$  (ppm): 7.97 - 7.27 (m, 9H), 7.19 - 6.89 (m, 5H), 6.68 - 6.60 (m, 4H), 3.94 - 3.87 (m, 4H), 1.75 - 1.69 (m, 4H), 1.41 - 1.26 (m, 20H), 0.89 - 0.84 (m, 6H)  
 GPC:  $M_n = 23155$ ,  $M_w = 35026$ , PDI = 1.51.

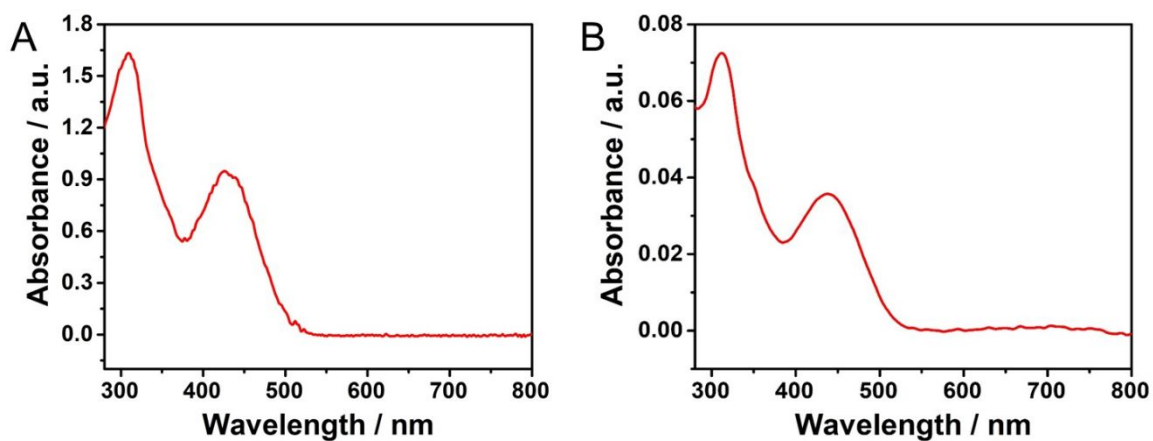

Figure S2. Absorbance spectra of (A) polymer in THF and (B) Pdots.

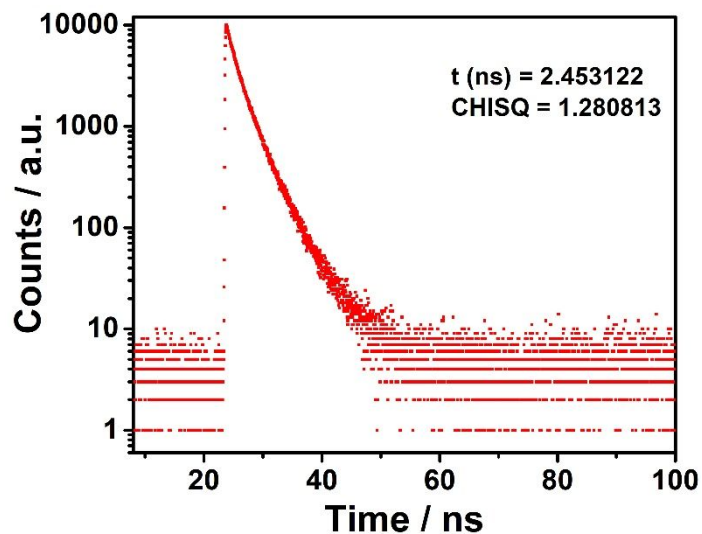

Figure S3. Phosphorescent lifetime of Pdots, which was recorded at excitation wavelength of 365 nm.

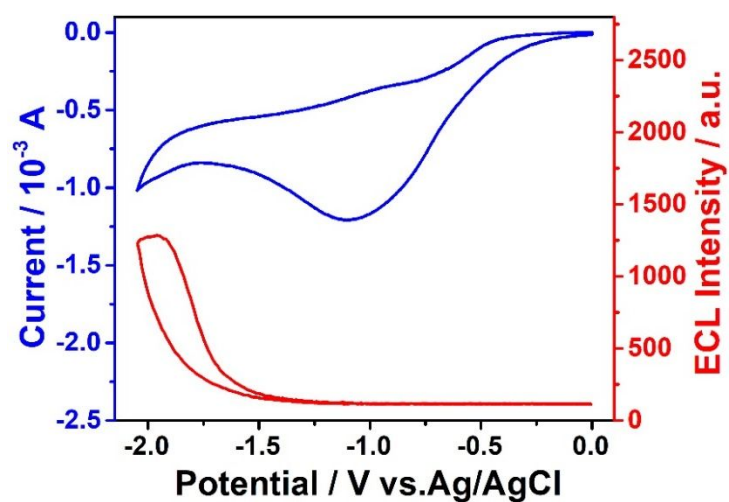

Figure S4. Cyclic voltammetry curve (blue line) and ECL profile (red line) of 5 µg/mL Pdts containing 0.1 M  $\text{K}_2\text{S}_2\text{O}_8$ . (voltage of PMT, 800 V)

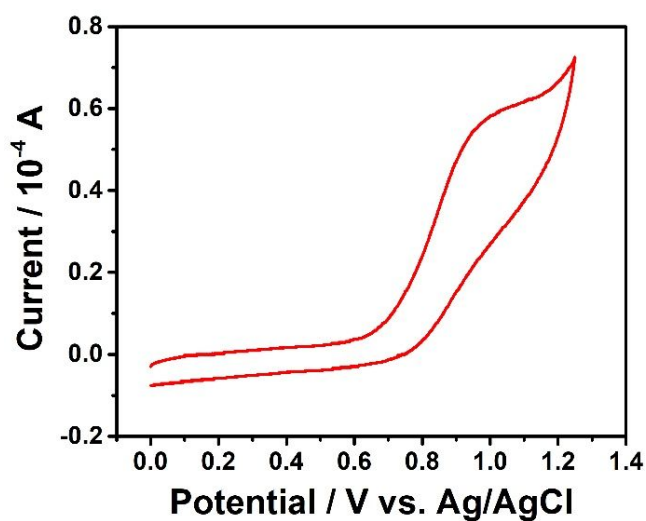

Figure S5. Cyclic voltammogram of 25 mM TPRA in PBS solution (scan rate, 100 mV/s).

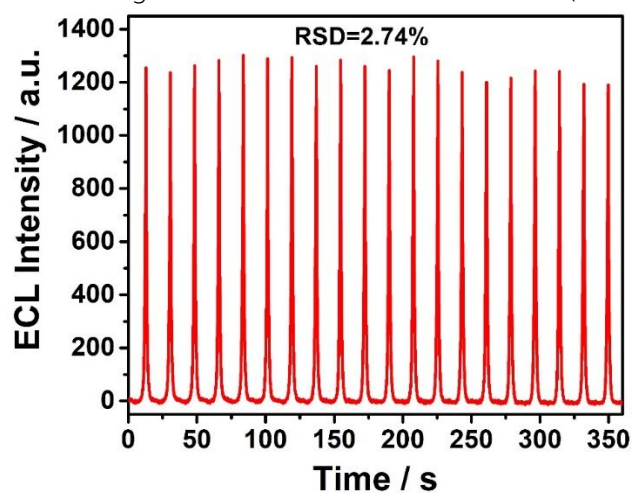

Figure S6. ECL stability test of Pdts modified GCE with 0.1 M  $\text{K}_2\text{S}_2\text{O}_8$  under 20 cyclic potential scans. (voltage of PMT, 800 V)

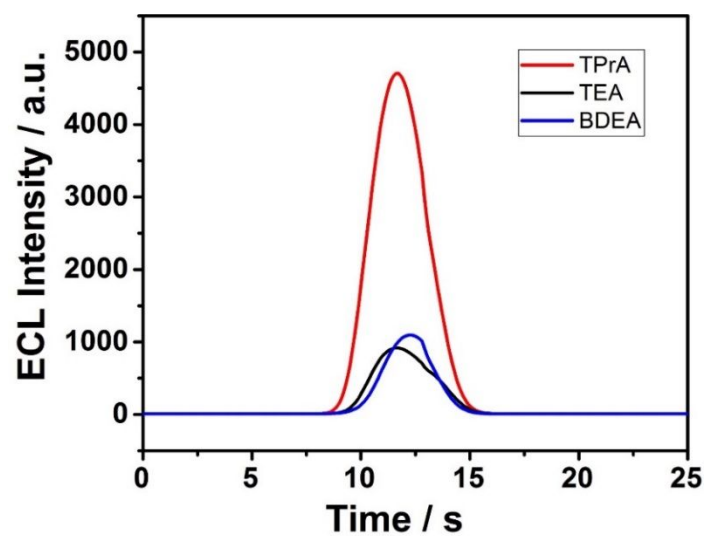

Figure S7. ECL intensity comparison of Pdots with different coreactants.

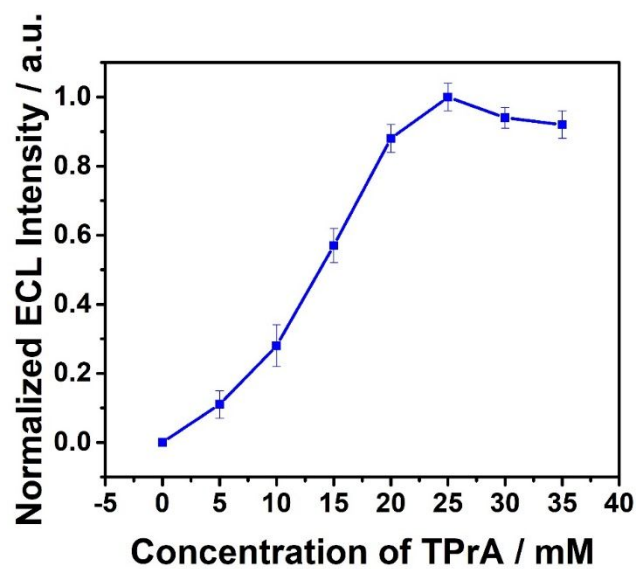

Figure S8. Optimization of the TPrA concentration.

|                | M | a | b | c | d | e |
|----------------|---|---|---|---|---|---|
| H <sub>0</sub> |   | + | - | + | + | - |
| miRNA-21       |   | - | + | + | + | - |
| DSN            |   | - | - | - | + | - |
| S <sub>1</sub> |   | - | - | - | - | + |

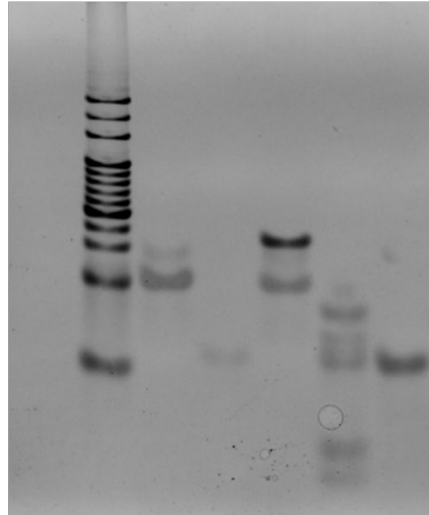

**Figure S9.** Polyacrylamide gel electrophoresis analysis. Lane M: DNA ladder; lanes a–e: as indicated above.

|                | M | a | b | c | d | e |
|----------------|---|---|---|---|---|---|
| H <sub>1</sub> |   | + | - | + | + | + |
| H <sub>2</sub> |   | - | + | - | + | + |
| S <sub>1</sub> |   | - | - | + | + | - |
| Annealing      |   | - | - | - | - | + |

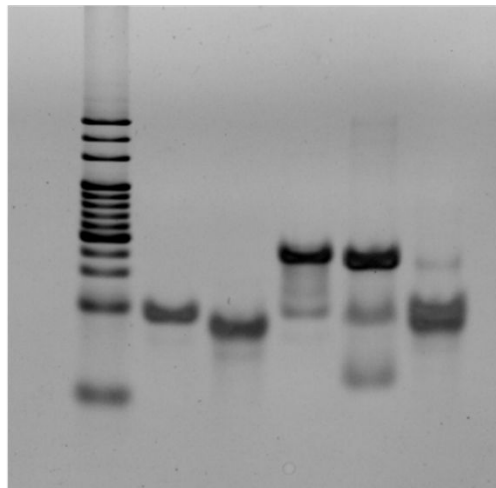

**Figure S10.** Polyacrylamide gel electrophoresis analysis. Lane M: DNA ladder; lanes a–e: as indicated above.



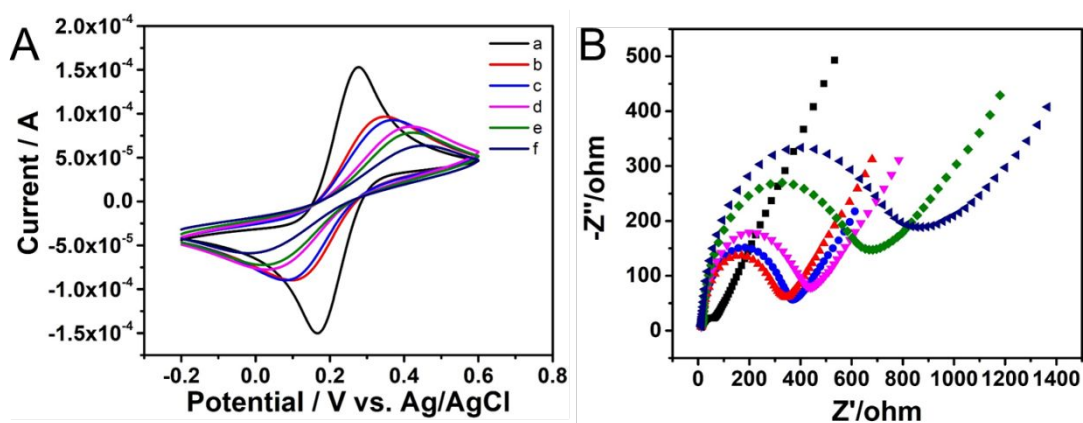

Figure S11. (A) Cyclic voltammograms and (B) EIS profiles of the stepwise fabrications of the ECL immunosensor: (a) bare GCE, (b) Pdots/a, (c)  $\text{H}_1/\text{b}$ , (d) MCH/c, (e) S1/d, (f)  $\text{H}_2\text{-BHQ}/\text{e}$ .

### 3. Supplementary Tables

Table S1. DNA and miRNA sequences used in this work.

| name         | Sequences (5' to 3' )                                                                                        |
|--------------|--------------------------------------------------------------------------------------------------------------|
| $\text{H}_0$ | TTTCAACATCAGTCTGATAAGCTATTTGATCCCATTA<br>TCAGACTTGCCTCT                                                      |
| $\text{H}_1$ | $\text{NH}_2\text{-(CH}_2\text{)}_6\text{TTTTTTTAGAGGCAAGTCTGATAATGGG}$<br>ATCATGCCTCTAACCTGATCCCATTAATCAGAC |
| $\text{H}_2$ | TTTTATGGGATCAGGTTAGAGGCATGATCCCATTAATC<br>AGACATGCCTCTAACCT-BHQ <sub>2</sub>                                 |
| Report DNA   | TTTGATCCCATTAATCAGACTTGCCTCT                                                                                 |
| miRNA-21     | UAGCUUAUCAGACUGAUGUUGA                                                                                       |
| miRNA-107    | AGCAGCAUUGUACAGGGCUAU                                                                                        |
| miRNA-122    | UGGAGUGUGACAAUGGUGUUUG                                                                                       |
| miRNA-141    | UAACACUGUCUGGUAAAGAUGG                                                                                       |

Table S2. Summarization of the experimental findings for Pdots.

|       | Abs (nm) | PL (nm) | T (ns) | PLQY (%) | Zeta potential (mV) |
|-------|----------|---------|--------|----------|---------------------|
| Pdots | 312, 438 | 573     | 2.45   | 25.43    | -15.8               |

Table S3. Comparison of the ECL efficiency of different nanomaterials.

| Material         | coreactants | $\Phi_{\text{ECL}}$ (%) | Ref. |
|------------------|-------------|-------------------------|------|
| o@CdInS          | TPrA        | 2.1                     | 1    |
| TPE nanocrystals | TEA         | 1.35                    | 2    |

|                 |                                              |           |           |
|-----------------|----------------------------------------------|-----------|-----------|
| TPE-CMP         | TPrA                                         | 1.72      | 3         |
| CN-PPV Pdots    | K <sub>2</sub> S <sub>2</sub> O <sub>8</sub> | 11.22     | 4         |
|                 | TPrA                                         | 1.84      |           |
| PFBT Pdots      | TPrA                                         | 1.2       | 5         |
|                 | TPrA                                         | 0.5       | 6         |
| TPE-based Pdots | TPrA                                         | 11.8      | 7         |
|                 | TEA                                          | 11        | 8         |
| <b>Pdots</b>    | TPrA                                         | <b>10</b> | This work |

**Table S4.** Comparison of the linear range and detection limits of different methods for detection of miRNA-21.

| Methods                                      | Linear range   | Detection limit | Ref. |
|----------------------------------------------|----------------|-----------------|------|
| Square Wave Voltammetry (SWV)                | 1.0 pM-10.0 nM | 0.26 pM         | 9    |
| Chronoamperometry (CA)                       | 0.1 pM-70 pM   | 0.06 pM         | 10   |
| Amperometry (I-t)                            | 1 pM-5000 pM   | 0.4 pM          | 11   |
| Amperometry (I-t)                            | 5 pM-5000 pM   | 3.96 pM         | 12   |
| Differential Pulse Voltammetry (DPV)         | 200 pM-388 nM  | 100 pM          | 13   |
| Differential Pulse Voltammetry (DPV)         | 100 aM-1 nM    | 78 aM           | 14   |
| Fluorescent (FL)                             | 1 fM-0.5 pM    | 0.27 fM         | 15   |
| Fluorescent (FL)                             | 0.001 nM-10 nM | 300 fM          | 16   |
| Electrochemical Impedance Spectroscopy (EIS) | 1 pM-1000 pM   | 0.3 pM          | 17   |
| Electrochemical Impedance Spectroscopy (EIS) | 10 fM-50 pM    | 4.63 fM         | 18   |
| Photoelectrochemistry (PEC)                  | 1 fM-500 fM    | 0.56 fM         | 19   |
| Photoelectrochemistry (PEC)                  | 1 fM-1 nM      | 0.26 fM         | 20   |

|                                   |               |         |           |
|-----------------------------------|---------------|---------|-----------|
| Electrochemiluminescence<br>(ECL) | 1 fM-100 pM   | 600 aM  | 21        |
| Electrochemiluminescence<br>(ECL) | 0.5 fM-10 pM  | 0.17 fM | 22        |
| Electrochemiluminescence<br>(ECL) | 100 aM-100 pM | 33 aM   | 23        |
| Electrochemiluminescence<br>(ECL) | 1 fM-100 pM   | 0.28 fM | 24        |
| Electrochemiluminescence<br>(ECL) | 0.1 fM-100 pM | 32 aM   | This work |

## References

- (1) Wang, F., Lin, J., Zhao, T., Hu, D., Wu, T., Liu, Y., *J. Am. Chem. Soc.* **2016**, *138*, 7718-7724.
- (2) Liu, J.-L., Zhang, J.-Q., Tang, Z.-L., Zhuo, Y., Chai, Y.-Q., Yuan, R., *Chem. Sci.* **2019**, *10*, 4497-4501.
- (3) Cui, L., Yu, S., Gao, W., Zhang, X., Deng, S., Zhang, C.-y., *ACS Appl. Mater. Interfaces* **2020**, *12*, 7966-7973.
- (4) Feng, Y., Wang, N., Ju, H., *Anal. Chem.* **2018**, *90*, 1202-1208.
- (5) Wang, N., Feng, Y., Wang, Y., Ju, H., Yan, F., *Anal. Chem.* **2018**, *90*, 7708-7714.
- (6) Wang, Z., Pan, J., Li, Q., Zhou, Y., Yang, S., Xu, J.-J., Hua, D., *Adv. Funct. Mater.* **2020**, *30*, 2000220.
- (7) Wang, Z., Feng, Y., Wang, N., Cheng, Y., Quan, Y., Ju, H., *J. Phys. Chem. Lett.* **2018**, *9*, 5296-5302.
- (8) Sun, F., Wang, Z., Feng, Y., Cheng, Y., Ju, H., Quan, Y., *Biosens. Bioelectron.* **2018**, *100*, 28-34.
- (9) Zhu, D., Liu, W., Zhao, D., Hao, Q., Li, J., Huang, J., Shi, J., Chao, J., Su, S., Wang, L., Label-Free Electrochemical Sensing Platform for MicroRNA-21 Detection Using Thionine and Gold Nanoparticles Co-Functionalized MoS<sub>2</sub> Nanosheet. *ACS Appl. Mater. Interfaces* **2017**, *9*, 35597-35603.
- (10) Yin, H., Zhou, Y., Zhang, H., Meng, X., Ai, S., Electrochemical determination of microRNA-21 based on graphene, LNA integrated molecular beacon, AuNPs and biotin multifunctional bio bar codes and enzymatic assay system. *Biosens. Bioelectron.* **2012**, *33*, 247-253.
- (11) Zhou, Y., Zhang, Z., Xu, Z., Yin, H., Ai, S., MicroRNA-21 detection based on molecular switching by amperometry. *New J. Chem.* **2012**, *36*, 1985-1991.
- (12) Zhou, Y., Wang, M., Meng, X., Yin, H., Ai, S., Amplified electrochemical microRNA biosensor using a hemin-G-quadruplex complex as the sensing element. *RSC Adv.* **2012**, *2*, 7140-7145.
- (13) Mandli, J., Mohammadi, H., Amine, A., Electrochemical DNA sandwich biosensor based on enzyme amplified microRNA-21 detection and gold nanoparticles. *Bioelectrochemistry* **2017**, *116*, 17-23.
- (14) Tian, L., Qian, K., Qi, J., Liu, Q., Yao, C., Song, W., Wang, Y., Gold nanoparticles superlattices assembly for electrochemical biosensor detection of microRNA-21. *Biosens. Bioelectron.* **2018**, *99*, 564-570.
- (15) Yin, H.-S., Li, B.-C., Zhou, Y.-L., Wang, H.-Y., Wang, M.-H., Ai, S.-Y., Signal-on fluorescence biosensor for microRNA-21 detection based on DNA strand displacement reaction and Mg<sup>2+</sup>-

dependent DNAzyme cleavage. *Biosens. Bioelectron.* **2017**, *96*, 106-112.

(16) Xi, Q., Zhou, D.-M., Kan, Y.-Y., Ge, J., Wu, Z.-K., Yu, R.-Q., Jiang, J.-H., Highly Sensitive and Selective Strategy for MicroRNA Detection Based on WS2 Nanosheet Mediated Fluorescence Quenching and Duplex-Specific Nuclease Signal Amplification. *Anal. Chem.* **2014**, *86*, 1361-1365.

(17) Azzouzi, S., Mak, W. C., Kor, K., Turner, A. P. F., Ali, M. B., Beni, V., An integrated dual functional recognition/amplification bio-label for the one-step impedimetric detection of Micro-RNA-21. *Biosens. Bioelectron.* **2017**, *92*, 154-161.

(18) Meng, T., Zhao, D., Ye, H., Feng, Y., Wang, H., Zhang, Y., Construction of an ultrasensitive electrochemical sensing platform for microRNA-21 based on interface impedance spectroscopy. *J. Colloid Interface Sci.* **2020**, *578*, 164-170.

(19) Li, B., Li, X., Wang, M., Yang, Z., Yin, H., Ai, S., Photoelectrochemical biosensor for highly sensitive detection of microRNA based on duplex-specific nuclease-triggered signal amplification. *J. Solid State Electrochem.* **2015**, *19*, 1301-1309.

(20) Yi, W., Cai, R., Xiang, D., Wang, Y., Zhang, M., Ma, Q., Cui, Y., Bian, X., A novel photoelectrochemical strategy based on an integrative photoactive heterojunction nanomaterial and a redox cycling amplification system for ultrasensitive determination of microRNA in cells. *Biosens. Bioelectron.* **2019**, *143*, 111614.

(21) Feng, Q., Wang, M., Zhao, X., Wang, P., Construction of a Cytosine-Adjusted Electrochemiluminescence Resonance Energy Transfer System for MicroRNA Detection. *Langmuir* **2018**, *34*, 10153-10162.

(22) Peng, L., Yuan, Y., Fu, X., Fu, A., Zhang, P., Chai, Y., Gan, X., Yuan, R., Reversible and Distance-Controllable DNA Scissor: A Regenerated Electrochemiluminescence Biosensing Platform for Ultrasensitive Detection of MicroRNA. *Anal. Chem.* **2019**, *91*, 3239-3245.

(23) Liu, W., Chen, A., Li, S., Peng, K., Chai, Y., Yuan, R., Perylene Derivative/Luminol Nanocomposite as a Strong Electrochemiluminescence Emitter for Construction of an Ultrasensitive MicroRNA Biosensor. *Anal. Chem.* **2019**, *91*, 1516-1523.

(24) Xu, Z., Chang, Y., Chai, Y., Wang, H., Yuan, R., Ultrasensitive Electrochemiluminescence Biosensor for Speedy Detection of microRNA Based on a DNA Rolling Machine and Target Recycling. *Anal. Chem.* **2019**, *91*, 4883-4888.
